# Supplementary material for: Influences of heel height on human postural stability and functional mobility between inexperienced and experienced high heel shoe wearers
Source: PeerJ. 2020 Oct 28;8:e10239. doi: 10.7717/peerj.10239 (PMC7602679; doi:10.7717/peerj.10239)
Supplement: Supplemental Information 1 [file peerj-08-10239-s001.xlsx]

## Sheet: inexperienced wearers
composite_0.8	equi_c1_0.8	equi_c2_0.8	equi_c3_0.8	equi_c4_0.8	equi_c5_0.8	equi_c6_0.8	stra_c1_0.8	stra_c2_0.8	stra_c3_0.8	stra_c4_0.8	stra_c5_0.8	stra_c6_0.8	SOM0.8	VIS0.8	VEST0.8	composite_3.9	equi_c1_3.9	equi_c2_3.9	equi_c3_3.9	equi_c4_3.9	equi_c5_3.9	equi_c6_3.9	stra_c1_3.9	stra_c2_3.9	stra_c3_3.9	stra_c4_3.9	stra_c5_3.9	stra_c6_3.9	SOM3.9	VIS3.9	VEST3.9	composite_7	equi_c1_7	equi_c2_7	equi_c3_7	equi_c4_7	equi_c5_7	equi_c6_7	stra_c1_7	stra_c2_7	stra_c3_7	stra_c4_7	stra_c5_7	stra_c6_7	SOM7	VIS7	VEST7	composite_10.1	equi_c1_10.1
92	95.3333	93.6667	93.3333	95.3333	94.3333	81.3333	96.6667	95.3333	95	93.6667	91.3333	86	99	100	99	84	95.6667	96.3333	93	77.3333	81	77.6667	96	96.6667	94.6667	86	76.3333	82	101	81	85	92	96	95.6667	94.6667	97	83.6667	88	95	95	93	92	88.3333	88.3333	100	101	88	86	94
81	93	86	84.6667	87	82.6667	63.3333	94.6667	85.3333	90.3333	87.3333	77.3333	74	92	94	89	85	91.3333	87	88	89	82.3333	78.6667	91.6667	84	86.6667	84	78	79.3333	96	98	90	85	92.6667	88.6667	89	88	84.6667	80	92	89.3333	89.6667	87	72.6667	80.3333	96	95	91	86	93.3333
76	89	87.6667	84.3333	78.6667	72.3333	58.3333	93.3333	93	95.6667	88.3333	86.3333	83	99	89	81	73	85.3333	84.3333	85	79.6667	60.3333	60.6667	91.3333	91	92	87.6667	83	83.3333	99	94	71	75	88.6667	85.3333	85	80.3333	65	61.6667	95	93.3333	93.3333	88.3333	85.6667	83.3333	96	90	72	76	90.3333
88	96.6667	91.6667	92.6667	95.6667	83.6667	75	97	95.3333	95.6667	94	88	86.6667	95	99	87	87	94	91.3333	90	89.3333	82	81.6667	95.6667	96	95.3333	92	89.3333	87	95	99	87	86	94	92	85.3333	93.6667	86	72.6667	96.3333	95.3333	90.6667	92.3333	88	87	98	100	91	85	94
83	95	92.6667	92.6667	86	77.6667	70	97	96.3333	93.6667	89	86.6667	84.6667	98	91	82	88	95	90.6667	94.6667	91.3333	77	83.6667	95.6667	93.6667	96.3333	91.3333	87.6667	90	96	96	81	86	94.3333	92.3333	91.3333	84.6667	86.3333	77	95	93.6667	92.3333	89	88	86	98	90	91	84	91.3333
83	90	87.3333	87.3333	87	79.6667	76	93.6667	94.6667	91	86.3333	78	82.6667	97	97	89	87	93	91.3333	91.6667	92.3333	76.6667	86	94	91.3333	93.6667	89.3333	75.3333	86.6667	98	99	83	81	89.3333	91.3333	82	77.6667	84.6667	72.3333	93.6667	91.3333	82.6667	79.3333	81.6667	70.3333	102	88	96	90	91.3333
76	86	90	87.3333	70.6667	82	57.6667	93.6667	95.3333	93	87.3333	88.3333	83.6667	105	83	95	86	95.3333	94.3333	94	90.3333	81.6667	70.3333	97	97	96.3333	91.6667	86.6667	82.6667	99	95	86	89	95.6667	94.3333	94	91.6667	81.6667	82.6667	97.6667	96.3333	96.3333	92	85	88	98	96	85	88	92
77	93.3333	89	85.6667	77	75.3333	58.6667	95.6667	94.3333	92.3333	83.3333	83.6667	76	96	83	81	86	94.6667	92	91.6667	89	76.3333	81	95.3333	95.3333	94.3333	90.3333	84	86.3333	97	94	80	79	89.3333	80	84	86.3333	74.3333	67.3333	92.6667	87.6667	91	83.3333	81.3333	77.6667	90	97	83	81	90.3333
76	94.6667	90.6667	88	63	65.3333	76	97.3333	92.6667	94.3333	83.6667	78	86.3333	96	66	68	85	92	92	89.6667	89.3333	85.6667	71.3333	95.3333	94.6667	94.3333	91.6667	86.3333	85.3333	100	97	93	84	94.6667	92	90.3333	81.3333	79.3333	77	96.3333	93.3333	96	84	80	85	97	85	83	82	92.3333
93	96	93.3333	95	93.6667	94.6667	89.3333	97	96	95.6667	95	91.6667	89.3333	97	98	99	94	94.6667	95.6667	96	97.3333	93	87.3333	96.6667	96.6667	97.6667	94.6667	90.6667	89.6667	101	102	98	93	96.6667	95.3333	94.6667	95	88	93.3333	96.3333	95.6667	96.3333	93	89	92	98	98	91	90	96
72	82	85	81.6667	73	67.6667	57.6667	87	92.6667	89.6667	86.3333	82	77.3333	104	89	83	68	87.6667	77.3333	83	50.6667	62.6667	65	95.6667	84.3333	93	77.3333	80	70.6667	88	58	72	73	87	81.6667	80.6667	65.6667	72	65.6667	93	88.3333	89.6667	82.6667	85	83.3333	94	76	83	82	86.3333
91	93.3333	94	93.6667	93.3333	89.6667	84	94.6667	95.6667	95.6667	92.6667	89.3333	90.6667	101	100	97	92	94	93.3333	93	89.6667	90	95.3333	96	96	97.3333	91.6667	90	94	99	96	96	88	93.3333	93	92.6667	89.3333	88.3333	78	94.6667	95.6667	96.3333	92.3333	89	89	100	96	95	85	90.3333
82	95.6667	89.6667	91.6667	89	78.3333	63.3333	96.3333	92.3333	94.6667	89.6667	82.6667	84	94	93	81	86	94	89	84.3333	92.6667	80	85.6667	96.3333	95	88	90.6667	82.3333	84.3333	95	99	85	88	93.6667	87.3333	90.6667	92.3333	86.6667	79.3333	95.3333	88.6667	93	90.3333	83.3333	78.6667	93	98	93	84	91.3333
89	93.3333	91.6667	91.3333	92	88	81	90.6667	94.6667	94.3333	89.3333	84.3333	84.3333	99	99	95	89	95.6667	89.3333	93	95.3333	81	84.3333	96.3333	92.6667	93.3333	90	79.6667	81	93	99	84	89	94.3333	90.6667	90.3333	92.3333	85	84.3333	94.3333	90.6667	91.3333	86.3333	84.3333	86.3333	97	98	90	84	88
88	96	92.6667	95.3333	91.3333	85.6667	77	97.3333	96	97	90.6667	90.3333	89.6667	97	95	90	91	94.3333	94	91.6667	93	94.6667	82.6667	97.6667	96.6667	96	93	93.6667	90.3333	100	99	101	84	90.6667	90.6667	88.3333	87.3333	79	74.3333	92.6667	93	93.6667	88.6667	77	80	100	96	87	85	93.6667
66	89.6667	91	80.3333	62.3333	50	55.3333	95	94.6667	92.3333	84	79.6667	82	101	69	56	80	89.6667	93.6667	81.6667	82	79.6667	69	94.3333	94.3333	91	86	80.3333	82.6667	104	91	89	75	83	84.3333	79.3333	80	75	60.3333	93	92.6667	88.3333	85	84.3333	82	101	96	90	83	89
88	94.6667	89.3333	92	93	82.3333	80.6667	95.6667	93.3333	96.3333	91.3333	87.3333	86.3333	94	98	86	89	96.6667	93.6667	92.6667	95.3333	88	75.6667	97.3333	95.3333	95.6667	93.6667	89.6667	84.6667	97	98	91	88	92.6667	85.3333	93.3333	90.6667	83.6667	85	95.3333	90.6667	94.6667	89.6667	86.6667	87.6667	91	98	90	84	91
87	94.6667	92.6667	92.3333	91	80.6667	77.6667	96	93.3333	95.6667	90	85.3333	85.3333	98	96	85	83	93.6667	92.6667	85.6667	92.3333	85.6667	63	97	94.6667	93	91	85	79.3333	99	98	91	85	94.3333	88.6667	90.6667	95	81	71	95.6667	94.3333	94.3333	91.3333	81.3333	84	95	101	86	86	92.3333
85	94	92.6667	92	85.3333	77.3333	81.6667	95.3333	94.6667	95	88.3333	84	88.3333	99	90	82	80	94.6667	92.6667	90.6667	96.3333	61	61	96.6667	95	95.3333	94	82.3333	81.3333	98	101	64	81	93	88.3333	86.6667	91.6667	69.6667	71.6667	95.3333	92	94	90.3333	76	84	95	99	75	82	91
91	96	93	93.3333	93.6667	91.6667	83.3333	96.6667	94	95.3333	93.3333	88.6667	87.6667	97	98	96	84	94	92.6667	88.3333	88.6667	72.3333	79.3333	97.3333	95	93.3333	90.6667	86	88	99	95	77	91	95.3333	91.6667	91	94	84.6667	90.6667	96	93.6667	95	93.3333	86	88.3333	97	99	89	88	95.3333
90	95	92.3333	93	94.3333	83.3333	85	95.6667	92.3333	95	90.3333	83	85.3333	97	99	87	85	96	92	90.3333	91	79.6667	73.6667	96.3333	94	92.3333	91.3333	85	80.3333	96	95	83	90	93	89.6667	92	89.3333	85.3333	90	96	92.6667	95	88.6667	84.6667	89	97	96	91	84	88.6667
[truncated: 14 more columns]

## Sheet: experienced wearers
composite_0.8	equi_c1_0.8	equi_c2_0.8	equi_c3_0.8	equi_c4_0.8	equi_c5_0.8	equi_c6_0.8	stra_c1_0.8	stra_c2_0.8	stra_c3_0.8	stra_c4_0.8	stra_c5_0.8	stra_c6_0.8	SOM0.8	VIS0.8	VEST0.8	composite_3.9	equi_c1_3.9	equi_c2_3.9	equi_c3_3.9	equi_c4_3.9	equi_c5_3.9	equi_c6_3.9	stra_c1_3.9	stra_c2_3.9	stra_c3_3.9	stra_c4_3.9	stra_c5_3.9	stra_c6_3.9	SOM3.9	VIS3.9	VEST3.9	composite_7	equi_c1_7	equi_c2_7	equi_c3_7	equi_c4_7	equi_c5_7	equi_c6_7	stra_c1_7	stra_c2_7	stra_c3_7	stra_c4_7	stra_c5_7	stra_c6_7	SOM7	VIS7	VEST7	composite_10.1	equi_c1_10.1
72	94.3333	91.6667	87.3333	61.3333	67	56.6667	96.3333	95	94	85.6667	82.3333	81.3333	98	65	71	80	93.3333	90.3333	90	69.6667	79	74	95.6667	93.6667	94.6667	84.3333	83	82.3333	97	75	85	81	86.6667	91.6667	86.3333	88	74	68.6667	90	95.3333	92.6667	87.3333	74.6667	79.3333	106	101	85	83	86.6667
73	87	84.3333	87.3333	80	62	55.3333	93.6667	92.6667	94.6667	88.6667	85.6667	79	97	92	71	76	87	86.3333	87.3333	80.6667	69.6667	57.3333	94.3333	91.6667	95	87.6667	79.3333	82.6667	99	93	80	78	93	89.6667	84	79	77.3333	62	96	95	93.6667	87	84.3333	76.3333	97	85	83	82	89
88	95.3333	90.6667	91.6667	91.6667	84.3333	80	96.3333	94	95.3333	92	87	87.6667	96	97	88	88	95	93.6667	93.6667	94.3333	87.3333	74.6667	96.3333	96	95.6667	93.6667	92.3333	89.3333	99	99	92	90	94	92.3333	91.6667	93.6667	86.6667	86	96	94.6667	94.3333	92	88	89	98	100	93	86	90.3333
85	93.3333	87	89.3333	88.6667	83.3333	73.6667	95.6667	94	94.6667	90.6667	85.6667	85.3333	94	96	89	89	94.3333	92.3333	92.6667	90.3333	82	86.6667	95.6667	94.6667	95	86.6667	85.6667	88	98	96	87	88	92.6667	89.6667	91.3333	94.6667	80	82.6667	94.3333	94	94	90	82.3333	85.3333	97	102	86	85	90.6667
92	94	88	95	95	88	90.6667	94.6667	90.6667	97.6667	93.3333	91.6667	90	94	101	94	85	96	93	90	89.6667	78.3333	77.3333	93.3333	96	95.3333	92	83	89.3333	97	94	81	91	96	92.3333	93.3333	93.3333	84	90.6667	96.3333	94.6667	95.6667	93	88	89.6667	96	97	88	90	92
89	96	92.6667	95	90.6667	83.6667	85	97	97.3333	97	93	88.6667	92	97	95	88	86	93.3333	89.3333	90.3333	95	76.3333	79.6667	96.3333	93.3333	96.6667	93.6667	86.6667	88.6667	96	102	82	88	93	89.3333	90.3333	89	83.6667	85	95.3333	94	95	90.3333	89.3333	89	96	96	90	82	93.6667
92	95.3333	93.6667	91.6667	96.3333	92.3333	88	95.3333	94.3333	95.3333	93.3333	91	91	99	101	97	87	90.6667	93.3333	92.3333	92.3333	82	77.3333	96.6667	97.3333	96.6667	94.3333	90	88	102	101	90	91	93.6667	93	92	93.6667	89.6667	87	95.6667	95	95.3333	92	85.6667	89.3333	99	100	96	90	93.3333
93	97	95.6667	93.6667	93	92	89.6667	97.3333	96.3333	95.6667	92	91	89	99	96	95	93	96	94.6667	93.6667	96.6667	88.6667	89.6667	98	97.3333	97	94.6667	88.6667	90.6667	99	101	93	93	95.3333	94.3333	95	96.3333	89	89.6667	96.3333	95.3333	96	93.3333	87	88	99	101	94	93	94.3333
88	95.3333	92.3333	92.3333	93.3333	81.6667	78.6667	97	96.3333	95.6667	91	84.6667	86	97	98	86	90	93.6667	94.6667	92	91.3333	93	82.6667	96.3333	96	96	91.6667	91.3333	88.6667	101	97	99	92	93.6667	89.6667	94.3333	94	85	93.6667	95	94	96	94	85.3333	93.3333	96	100	90	82	95
84	92.3333	92.3333	93.3333	91	82.6667	63.6667	95.3333	95.6667	95.6667	86.3333	87.3333	85	100	99	90	80	92	86.6667	93.3333	89	79.6667	51.6667	94.3333	94	97	91	86.6667	83.3333	95	97	87	80	90.3333	89.3333	86	86.6667	78.6667	64	92.3333	91	87.6667	88.6667	84.3333	81.3333	99	97	88	83	92
87	94.6667	93.3333	89	93.3333	82.3333	77	96.3333	95.3333	94.6667	91.3333	88.6667	89.3333	98	98	86	84	95.3333	94.6667	91.6667	87.6667	70	77.3333	97	96	95.6667	89	86	88.3333	100	93	74	85	92	88.3333	91.6667	90.3333	76.3333	77.6667	95.6667	93	95	90.3333	85.3333	89.3333	96	98	83	82	87.3333
85	93	93.3333	89.6667	87	80.3333	77	93	94.6667	93.6667	89.6667	83.3333	87.6667	100	94	86	86	94	92.3333	92.3333	86	81.3333	77.6667	95.6667	95	94.3333	88.3333	85	85.3333	98	91	86	85	94.3333	92	85.3333	88.6667	79.6667	80.3333	96	94	91.6667	88.3333	78.3333	83.3333	98	95	85	91	90.6667
82	90.3333	90	83.6667	91.3333	80	66	95	93.6667	95	90.6667	87	86	100	101	89	81	93.6667	92	86.3333	91.6667	67.3333	71.3333	95.6667	93.6667	93.6667	90	84	85.3333	98	98	71	85	93	90.3333	89.3333	88	75	85.3333	95	93	95	88	86	89.6667	97	95	81	76	88.3333
78	92	89.3333	86.6667	90.3333	71	57.3333	95	92.6667	94.3333	89.6667	84.3333	85	97	98	77	80	93	87.6667	89.3333	84.3333	61.3333	77	95.6667	93.6667	94.3333	88	84.3333	86.6667	95	90	66	85	92.6667	89.6667	89.3333	93	79	73	93	90.6667	92.3333	87	85	85.6667	97	100	85	78	91
91	88.6667	92	93.6667	91.6667	87	91.6667	93.3333	94.3333	94.3333	89	86.6667	90.3333	103	103	98	91	94.3333	92	93.3333	93.6667	88	87.3333	95	94.6667	94	91	85.6667	89	98	100	94	87	93.3333	91	91.3333	89	87.6667	74.6667	96	95	95.6667	87.6667	85.3333	75.6667	98	96	95	90	90.6667
90	96	91.6667	92	93.3333	87	85	96	94.3333	94.3333	89	84.6667	82.3333	96	97	91	89	95	92	93.3333	92.6667	87.3333	78.3333	96.3333	94	95.3333	90.6667	84	86	97	98	92	88	95.3333	91	91.6667	91	76	88.6667	94.6667	92.3333	94.6667	89.3333	84	85	96	96	80	90	94.3333
78	94.3333	94	93.3333	71.3333	75.6667	63	97	96.6667	96.3333	89	85.6667	83.6667	100	76	81	78	94.6667	92	91	89	63.3333	60.3333	97	96	96.3333	91.3333	69	84.3333	97	94	66	74	87	89.3333	88.6667	77.3333	69.6667	50	92.6667	93.3333	95	87.6667	82.3333	77.3333	102	89	80	77	90.3333
90	94	88.6667	92.6667	94.6667	89	80.3333	95.3333	96	96.3333	93.6667	91	88	95	101	95	86	93.3333	90	84.3333	91	84	83	97	95.6667	93.6667	92.3333	89.3333	89.3333	97	98	89	84	89.6667	88.3333	78.3333	89.6667	79.3333	83.3333	96.3333	94.3333	93.6667	92	87.3333	88.6667	98	100	88	83	90.6667
93	95.6667	94	96	96	85.6667	91.3333	97.6667	97	97	95	90.3333	92	98	100	90	90	94.3333	94.3333	95.3333	94.6667	87	80.3333	97.3333	97	96.6667	94	90	90.3333	100	101	93	88	96	92.6667	93	93.3333	79	84.6667	96.3333	96	97	92.6667	87.6667	89	97	97	82	90	92.6667
87	93	92.6667	91.6667	88.6667	81.3333	84	94.3333	94.6667	94.3333	88.6667	87.6667	86.6667	100	96	87	85	92.3333	89.6667	89.3333	92.6667	86.6667	69.3333	94.3333	92.6667	94.3333	89.6667	86	86.3333	98	101	95	86	94.3333	92.6667	88.3333	91.3333	86	75	96.6667	93.6667	94	90	83.6667	81	99	97	91	90	94.3333
[truncated: 14 more columns]
