# Supplementary material for: Influences of heel height on human postural stability and functional mobility between inexperienced and experienced high heel shoe wearers
Source: PeerJ. 2020 Oct 28;8:e10239. doi: 10.7717/peerj.10239 (PMC7602679; doi:10.7717/peerj.10239)
Supplement: Supplemental Information 2 [file peerj-08-10239-s002.xlsx]

## Sheet: inexperienced wearers
Lan_comp_0.8	AS_bs0.8	AS_bm0.8	AS_bl0.8	AS_fs0.8	AS_fm0.8	AS_fl0.8	Lan_comp_3.9	AS_bs3.9	AS_bm3.9	AS_bl3.9	AS_fs3.9	AS_fm3.9	AS_fl3.9	Lan_comp_7	AS_bs7	AS_bm7	AS_bl7	AS_fs7	AS_fm7	AS_fl7	Lan_comp_10.1	AS_bs10.1	AS_bm10.1	AS_bl10.1	AS_fs10.1	AS_fm10.1	AS_fl10.1
125	1	3	9	1	7	12	126	4	6	5	2	5	11	122	4	5	8	2	6	8	125	4	5	7	6	10	11
125	5	9	11	8	10	11	128	3	6	13	6	8	12	128	6	7	10	4	7	9	126	5	8	11	6	9	9
125	1	3	4	1	4	4		2	3	5	2	3	7	124	3	5	5	2	5	8	126	1	4	6	4	7	6
124	1	3	4	1	5	6	138	1	2	4	4	5	7	128	1	4	4	5	6	6	126	2	3	5	4	7	8
126	2	3	3	3	4	7	131	1	1	5	2	5	5	128	2	7	7	3	5	6	135	3	6	9	3	8	8
136	2	4	4	2	6	10	121	1	3	4	5	9	11	121	2	4	6	8	10	12	129	2	6	7	6	10	11
146	1	4	6	1	3	5	144	2	4	5	2	4	5	134	2	4	5	3	5	6	128	1	3	4	3	4	5
	3	6	6	2	4	4		2	3	7	2	4	5		2	7	7	3	4	5		4	6	6	3	4	6
132	3	9	11	1	1	5	124	2	9	10	1	6	5	126	5	7	12	1	7	8	121	4	6	9	4	7	10
120	2	5	5	2	5	6	120	2	4	7	2	5	6		4	4	6	3	4	6	124	2	4	7	3	7	7
139	2	3	4	3	4	5	132	2	2	4	2	5	5	136	1	2	3	1	4	5	126	2	2	3	2	4	4
122	1	2	4	1	3	6	125	2	3	5	2	4	4	124	1	3	3	1	3	3	119	2	5	7	2	5	7
126	2	4	9	3	4	6	128	7	11	15	3	6	8	125	3	9	13	4	7	8	128	3	7	11	5	6	8
125	1	5	6	2	3	8	129	2	9	9	2	4	7	119	2	3	5	4	7	10	134	3	6	8	3	8	11
145	2	6	11	2	3	6	136	1	7	10	1	5	7	129	4	10	12	3	6	10	132	5	6	10	3	6	7
132	1	2	5	1	4	6	142	3	2	5	5	9	12	128	2	3	5	4	8	12	131	3	2	6	4	8	8
126	1	1	2	2	3	3	125	1	2	3	2	2	6	135	1	3	4	2	3	6	130	2	3	5	2	5	8
124	1	2	4	2	4	6	128	3	4	6	4	6	9	130	2	3	5	3	4	8	121	2	2	5	5	7	12
120	2	6	9	3	5	9	119	1	3	7	4	6	7	120	2	8	7	5	6	10	120	4	6	4	4	9	10
120	1	3	7	4	6	7	115	2	6	7	2	6	8	118	3	4	6	4	6	9	119	2	3	5	4	6	9
118	2	4	5	1	4	5	120	3	3	5	1	3	5	126	1	5	5	2	4	4	125	2	4	6	4	6	6

## Sheet: experienced wearers
Lan_comp_0.8	AS_bs0.8	AS_bm0.8	AS_bl0.8	AS_fs0.8	AS_fm0.8	AS_fl0.8	Lan_comp_3.9	AS_bs3.9	AS_bm3.9	AS_bl3.9	AS_fs3.9	AS_fm3.9	AS_fl3.9	Lan_comp_7	AS_bs7	AS_bm7	AS_bl7	AS_fs7	AS_fm7	AS_fl7	Lan_comp_10.1	AS_bs10.1	AS_bm10.1	AS_bl10.1	AS_fs10.1	AS_fm10.1	AS_fl10.1
128	3	4	5	3	4	7	129	1	4	4	4	6	8	129	4	6	6	4	7	11	129	3	5	6	7	11	12
132	1	5	6	3	3	3	128	1	2	6	1	3	3	125	3	7	7	2	4	10	135	2	3	6	2	4	5
130	1	2	4	1	3	6	128	1	3	3	1	3	6	125	1	4	4	1	6	9	125	2	3	5	3	7	8
118	7	9	10	4	7	8	114	3	8	10	4	6	7	115	3	7	10	5	9	12	120	6	10	12	7	8	12
131	1	3	7	2	4	8	145	2	3	7	1	6	10	139	1	3	6	2	4	10	130	5	7	10	5	9	11
128	1	2	2	1	2	3	160	1	2	3	1	3	4	129	1	2	3	1	3	3	122	2	2	5	4	5	6
119	2	4	7	5	7	8	132	5	7	11	3	9	12	124	2	5	8	3	9	12	125	4	8	9	4	10	11
146	1	2	3	3	4	5	128	1	2	3	1	5	8	144	1	2	3	1	4	5	124	2	2	4	4	6	7
124	3	2	3	2	5	7	120	1	5	5	1	4	7	118	1	6	7	2	4	7	125	7	7	8	3	6	9
132	2	5	8	2	4	7	136	1	3	4	1	2	6	125	2	7	6	5	4	9	130	4	5	7	5	10	11
146	1	2	5	1	5	6	140	3	3	6	2	9	12	139	2	4	5	1	8	11	144	3	5	8	2	10	10
134	1	4	7	3	4	8	142	1	6	3	3	5	6	130	6	6	8	4	9	10	131	3	3	7	4	9	8
139	2	3	5	1	3	5	130	2	4	6	2	5	6	132	1	3	4	1	2	7	126	2	5	6	2	7	10
144	1	2	3	1	3	4	135	1	2	4	2	4	7	135	1	1	4	2	4	5	135	2	3	5	3	4	6
124	2	2	1	2	1	3	119	3	8	12	2	4	11	121	3	4	1	2	3	3	119	4	1	3	2	1	3
132	3	1	1	2	2	1	125	3	8	7	3	7	8	121	4	4	7	1	5	8	128	2	5	6	3	4	9
162	1	3	3	1	2	5	172	1	2	3	1	3	6	151	1	3	5	2	4	10	146	2	4	6	4	7	12
131	1	2	4	1	3	4	128	1	3	4	2	4	5	134	6	5	8	3	5	8	134	1	3	5	2	3	5
118	0	1	3	1	1	2	158	1	1	2	1	1	2	124	1	1	2	0	1	2	128	2	3	3	1	3	2
120	2	6	11	2	7	13	116	2	6	10	2	9	8	124	3	8	9	3	8	11	120	2	5	9	2	7	7
