# Supplementary material for: Influences of heel height on human postural stability and functional mobility between inexperienced and experienced high heel shoe wearers
Source: PeerJ. 2020 Oct 28;8:e10239. doi: 10.7717/peerj.10239 (PMC7602679; doi:10.7717/peerj.10239)
Supplement: Supplemental Information 3 [file peerj-08-10239-s003.xlsx]

## Sheet: inexperienced wearers
MVL_comp0.8	DCL_comp0.8	MVL_comp3.9	DCL_comp3.9	MVL_comp7	DCL_comp7	MVL_comp10.1	DCL_comp10.1
3.5	88	3.3	91	3.2	84	2.5	74
4	85	3.8	86	4.3	79	3.1	72
4.9	83	4.2	89	4.3	86	4.2	78
4.5	88	3.4	87	3.8	82	3.4	76
5.7	83	6.9	81	5.5	75	3.8	70
3	77	3.3	84	4.1	61	3.1	66
4.3	88	3.8	78	3.7	84	3.2	67
7.9	66	6.2	58	4.8	50	4.6	40
2.1	80	1.9	79	2	82	2.1	73
5.4	84	3	86	4.4	84	3.2	84
7	80	6.1	80	7	79	5.2	68
5.5	79	5.1	81	4.4	81	3.5	68
8.8	76	5.6	80	6.5	76	6.4	63
3.1	78	3	76	3.2	70	2	55
4.1	86	4.4	87	2.8	84	3.7	80
5	88	5.8	84	5.8	81	5.2	70
2.4	91	2.6	87	2.1	82	2.1	70
5.1	85	4.9	81	4.7	80	3.4	78
3.4	83	3.8	78	3.4	75	2	67
4.8	83	5.8	87	4.3	79	3.8	67
7.5	78	6.7	82	6.8	77	4.6	55

## Sheet: experienced wearers
MVL_comp0.8	DCL_comp0.8	MVL_comp3.9	DCL_comp3.9	MVL_comp7	DCL_comp7	MVL_comp10.1	DCL_comp10.1
6	82	5.2	84	4	77	4.3	68
8	87	6.3	87	6.6	81	5.8	80
5.8	86	6.2	86	5	84	4.6	80
4.9	75	6.2	81	6.8	74	3.6	65
5.3	91	4.2	89	5.6	86	3.6	82
4.9	81	5.5	84	4.1	78	3.9	80
3.8	86	5.6	80	3.9	69	3.5	79
4.7	88	3.4	90	4.6	83	3.4	82
4.5	88	4.2	88	5.2	85	4.4	77
5.9	85	6.8	85	7.2	76	5.9	78
4.5	83	5.1	83	3.6	83	4.8	83
4.5	85	3.3	89	2.9	87	3.3	83
3	84	3.3	83	3.8	82	3.3	81
7.5	76	7.8	81	6.8	76	7	73
2.9	88	3.1	89	2.2	87	2.6	85
5.1	87	3.8	87	3.2	88	3.7	80
4.4	82	5.3	83	4.6	74	4.2	61
6.4	83	7.1	83	4.6	74	4.1	76
4.4	88	3.9	87	5	86	3.4	84
9.4	84	7.7	80	7	74	6.7	72
