# Supplementary material for: Influences of heel height on human postural stability and functional mobility between inexperienced and experienced high heel shoe wearers
Source: PeerJ. 2020 Oct 28;8:e10239. doi: 10.7717/peerj.10239 (PMC7602679; doi:10.7717/peerj.10239)
Supplement: Supplemental Information 4 [file peerj-08-10239-s004.xlsx]

## Sheet: inexperienced wearers
FRT0.8	FRT3.9	FRT7	FRT10.1	TUGT0.8	TUGT3.9	TUGT7	TUGT10.1
27.6667	30	29.3333	20.6667	6.26333	7.01667	7.57667	9.41
37.8333	33.1667	36	22.6667	7.5	7.66667	7.73333	10.3
31.5	27.5	28.8333	21.1667	6.76667	7.03333	7.2	9.23333
41.1667	39.5	34.8333	28.5	5.83333	7.13333	6.76667	7.13333
39.5	37.5	33.6667	25.6667	7.06667	7.7	8.4	10.4
34.5	34.1667	31.1667	26.3333	8.06667	9.06667	10.6	11.8
32.1667	32.1667	30	23.8333	7.33333	7.4	8.13333	9.9
32	29	29.6667	22.6667	8.605	8.16667	9.03333	11.3333
30.3333	30.6667	20.6667	17	9.2	9.56667	10.7	12.2333
33.6667	29.1667	27.3333	25.6667	6.56667	6.66667	7.13333	8.16667
35.6667	39	37.3333	29.6667	5.8	6.7	6.86667	7.7
24.3333	24	23	23	6.93333	7.13333	7.26667	8
36.8333	34.6667	35.1667	26.3333	5	5.93333	6.43333	6.5
36	31.1667	27.1667	17	6.33333	6.73333	6.73333	7.4
30.5	27.5	28.6667	20.3333	5.86667	6.7	7.6	9
32	36	29.8333	25.8333	6.43333	7.53333	7.3	8.63333
26.5	23	24.5	18.6667	8.23333	9.03333	9.36667	11.1667
34	28	32.5	25.8333	4.06667	5.23333	4.83333	5.53333
41.6667	36.6667	35.3333	24.6667	5.33333	6.43333	7.26667	10.4333
35.6667	39.5	31.5	31.5	5.9	7.13333	7.23333	8
34.3333	29.8333	33.6667	23	5.3	6.13333	6.36667	8.33333

## Sheet: experienced wearers
FRT0.8	FRT3.9	FRT7	FRT10.1	TUGT0.8	TUGT3.9	TUGT7	TUGT10.1
24.5	22.8333	22.6667	19.5	6.26667	6.4	6.93333	7.66667
39.8333	38	34.6667	34.1667	5.46667	5.7	6.46667	6.5
37.1667	43.5	39.3333	34	5.3	5.9	6.06667	6.23333
41	40.3333	36.1667	30.8333	6.66667	6.53333	7.1	8.3
31.3333	30.5	32.6667	25.3333	6.76667	7.03333	7.03333	7.8
37.6667	38.1667	38.1667	29.5	5.96667	5.86667	6.43333	8.46667
37.8333	35	31	24	5.66667	7.16667	6.76667	6.83333
40.5	38.1667	36.1667	31.3333	6.16667	6.13333	6.26667	7.06667
32.3333	34.5	25.3333	26.6667	6.03333	6.6	6.8	8.1
30.3333	35.3333	33.6667	32	4.46667	4.53333	4.66667	5.2
37.3333	38.6667	39.5	37.6667	6.13333	6.2	6.23333	6.96667
40	37.3333	40.3333	33.8333	6.36667	6.46667	7.03333	7.26667
41.1667	42.6667	41.5	36.8333	5.8	5.93333	6	7.4
36	35.5	35.1667	30.1667	6.3	6.66667	6.43333	7.66667
41.1667	42.1667	36.8333	35.5	5.06667	5.5	6	6.5
37.3333	32.6667	29.6667	24.6667	6.26667	6.6	7.36667	7.83333
29.8333	28.1667	30.5	21.6667	6.93333	7.03333	8.4	9.93333
33	34.8333	35.8333	31.8333	5.83333	6.13333	5.9	6.36667
37.1667	33.8333	33.6667	30.5	7.33333	7.46667	7.53333	8.86667
43.1667	43.6667	38	31.8333	4.56667	5	5.2	6
