# Supplementary material for: Influences of heel height on human postural stability and functional mobility between inexperienced and experienced high heel shoe wearers
Source: PeerJ. 2020 Oct 28;8:e10239. doi: 10.7717/peerj.10239 (PMC7602679; doi:10.7717/peerj.10239)
Supplement: Supplemental Information 5 [file peerj-08-10239-s005.xlsx]

## Sheet: inexperienced wearer
VAS0.8	VAS3.9	VAS7	VAS10.1
16	83	27	35
100	100	39	14
84	81	50	71
99	74	53	20
76	65	58	6
86	85	49	25
80	64	15	3
90	80	70	20
100	100	69	60
78	59	56	34
89	73	67	36
97	95	84	27
98	85	79	63
93	88	69	58
96	97	71	38
100	85	56	13
95	68	50	26
100	74	49	7
85	91	93	61
99	77	82	90
78	47	42	16

## Sheet: experienced wearers
VAS0.8	VAS3.9	VAS7	VAS10.1
93	84	45	29
100	91	74	55
99	96	68	39
91	99	90	58
90	77	89	84
100	96	83	51
98	92	83	44
98	99	75	53
99	95	99	48
83	92	83	60
100	97	90	84
86	67	92	49
91	92		77
92	84	97	48
82	93	76	53
92	88	57	30
100	97	74	3
98	82	71	58
93	89	68	51
93	97	73	79
