# Supplementary material for: Influences of heel height on human postural stability and functional mobility between inexperienced and experienced high heel shoe wearers
Source: PeerJ. 2020 Oct 28;8:e10239. doi: 10.7717/peerj.10239 (PMC7602679; doi:10.7717/peerj.10239)
Supplement: Supplemental Information 6 [file peerj-08-10239-s006.xlsx]

## Sheet: inexperienced wearer
age	height(m)	BMI	HHS wearing time	weight	AHF	foot length-10%	foot length-90%	arch height-10%	arch height-90%
24	1.701	26.5777	0	76.9	0.0975293	241	244	57	51
26	1.738	23.8691	0	72.1	0.0866852	241	243	63	58
23	1.59	21.8741	0	55.3	0.135624	235	239	56	50
25	1.618	19.5193	0	51.1	0.244618	237	240	61	51
24	1.664	20.3691	0	56.4	0.0221631	230	232	56	55
25	1.51	24.648	0	56.2	0.066726	225	229	49	46
24	1.572	18.7764	0	46.4	0.0538793	214	217	54	52
23	1.62	23.2053	0	60.9	0.0821018	222	230	60	56
26	1.605	23.7964	8	61.3	0.0611746	233	236	57	54
27	1.678	20.3148	0	57.2	0.0655594	234	236	63	60
25	1.58	20.4294	0	51	0.122549	220	222	60	55
25	1.6	18.7109	0	47.9	0.104384	219	224	61	57
24	1.627	23.6105	4	62.5	0.12	236	240	62	56
24	1.66	24.9673	0	68.8	0.0726744	247	252	64	60
25	1.652	17.0386	0	46.5	0.16129	239	240	59	53
26	1.65	21.5243	0	58.6	0.0213311	231	239	56	55
30	1.586	20.7522	15	52.2	0.0957854	226	229	53	49
25	1.643	20.9672	0	56.6	0.0220848	228	230	53	52
27	1.67	21.2629	0	59.3	0.0632378	240	242	57	54
23	1.639	20.5485	14	55.2	0.113225	236	239	59	54
25	1.616	21.1759	5	55.3	0.0678119	226	231	55	52

## Sheet: experienced wearers
age	height(m)	BMI	HHS wearing time	weight	AHF	foot length-10%	foot length-90%	arch height-10%	arch height-90%
26	1.62	22.3289	42	58.6	0.0426621	215	220	57	55
23	1.665	18.6854	16	51.8	0.120656	239	244	59	54
22	1.61	18.9036	32	49	0.0765306	233	234	54	51
24	1.586	23.5748	24	59.3	0.105396	225	225	54	49
23	1.679	18.9426	50	53.4	0.0234082	232	238	51	50
21	1.545	17.3438	28	41.4	0.0301932	212	217	56	55
22	1.688	18.4955	36	52.7	0.142315	242	247	64	58
25	1.623	20.0825	17.5	52.9	0.118147	231	235	60	55
24	1.596	22.3774	16	57	0.0219298	225	227	57	56
25	1.644	21.0157	32	56.8	0.0440141	234	236	57	55
23	1.635	21.0981	40	56.4	0.0664894	243	249	59	56
20	1.69	19.6072	32	56	0.111607	233	237	58	53
23	1.63	23.9	16	63.5	0.0393701	234	237	58	56
25	1.61	21.797	16	56.5	0.0442478	226	230	60	58
19	1.695	23.39	21	67.2	0.130208	238	244	60	53
21	1.584	26.7033	25	67	0.0746269	227	231	52	48
27	1.612	25.8606	40	67.2	0.0186012	217	219	56	55
24	1.657	18.7934	35	51.6	0.0726744	235	239	56	53
19	1.587	18.2246	28	45.9	0.0272331	234	238	50	49
25	1.739	20.601	20	62.3	0.0802568	250	256	61	57
